# Supplementary material
Source: PubMed Central journal article supplement (PMC3487590)
Supplement: NIHMS408367-supplement-01.pdf [file NIHMS408367-supplement-01.pdf]

Fig. S1. DBS Surgical Method

A. MRI Compatible Head Frame

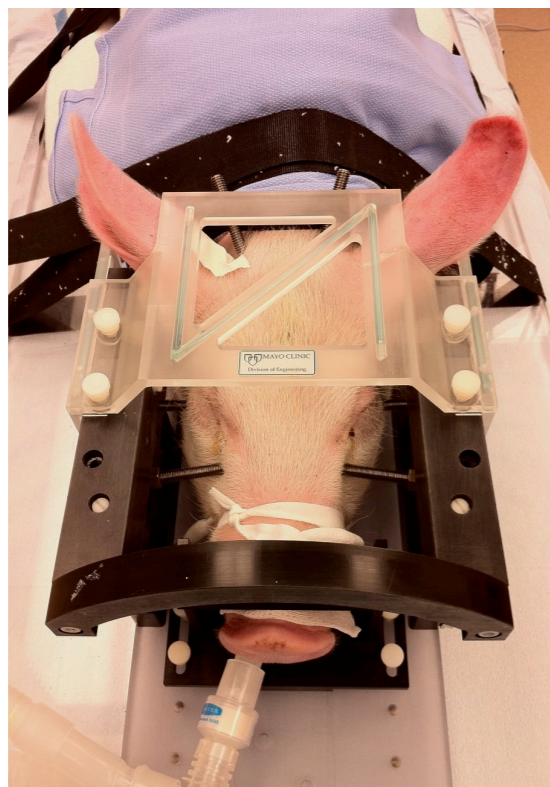

B. MR Image Based Targeting

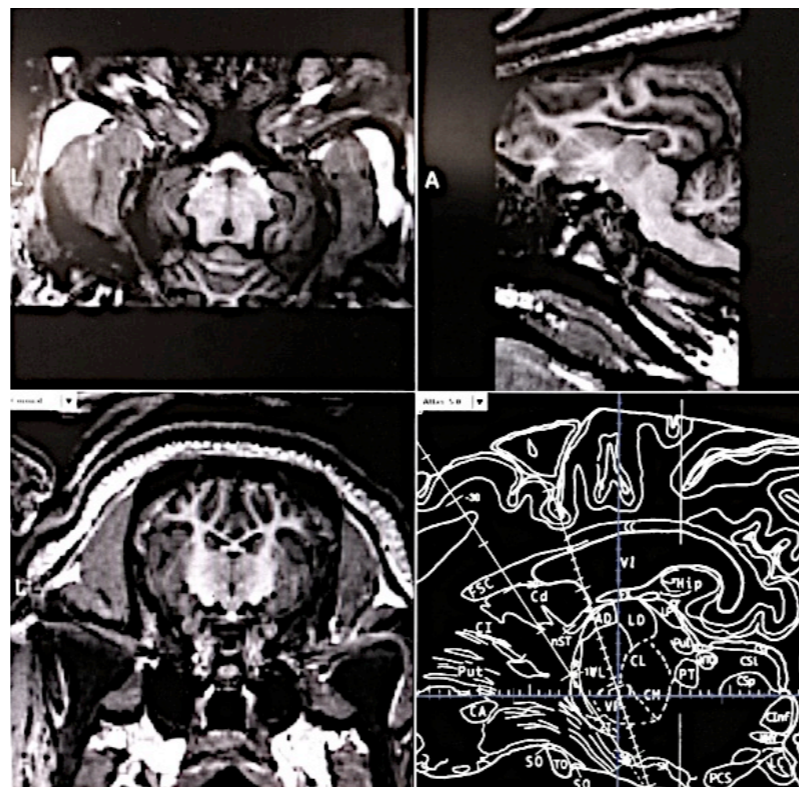

C. Leksell Stereotactic Surgery

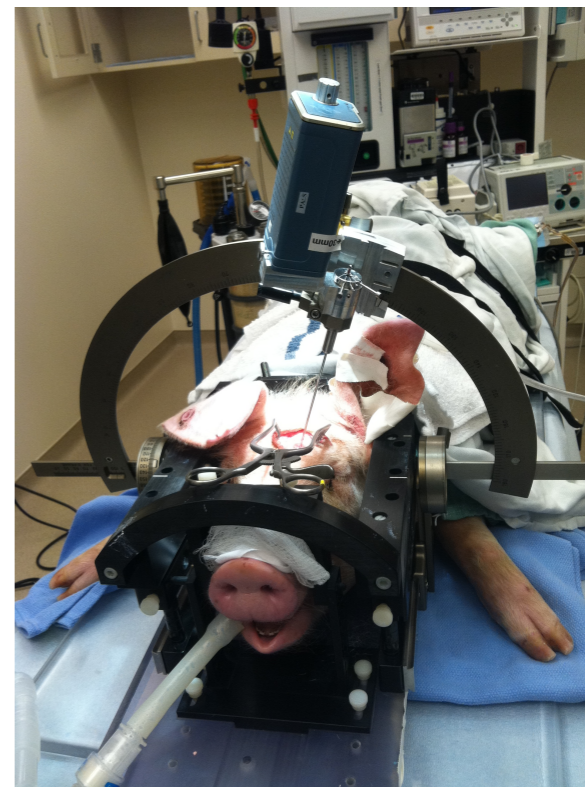

Fig. S2. BOLD % Change Time Course

A. STN DBS (n=7)

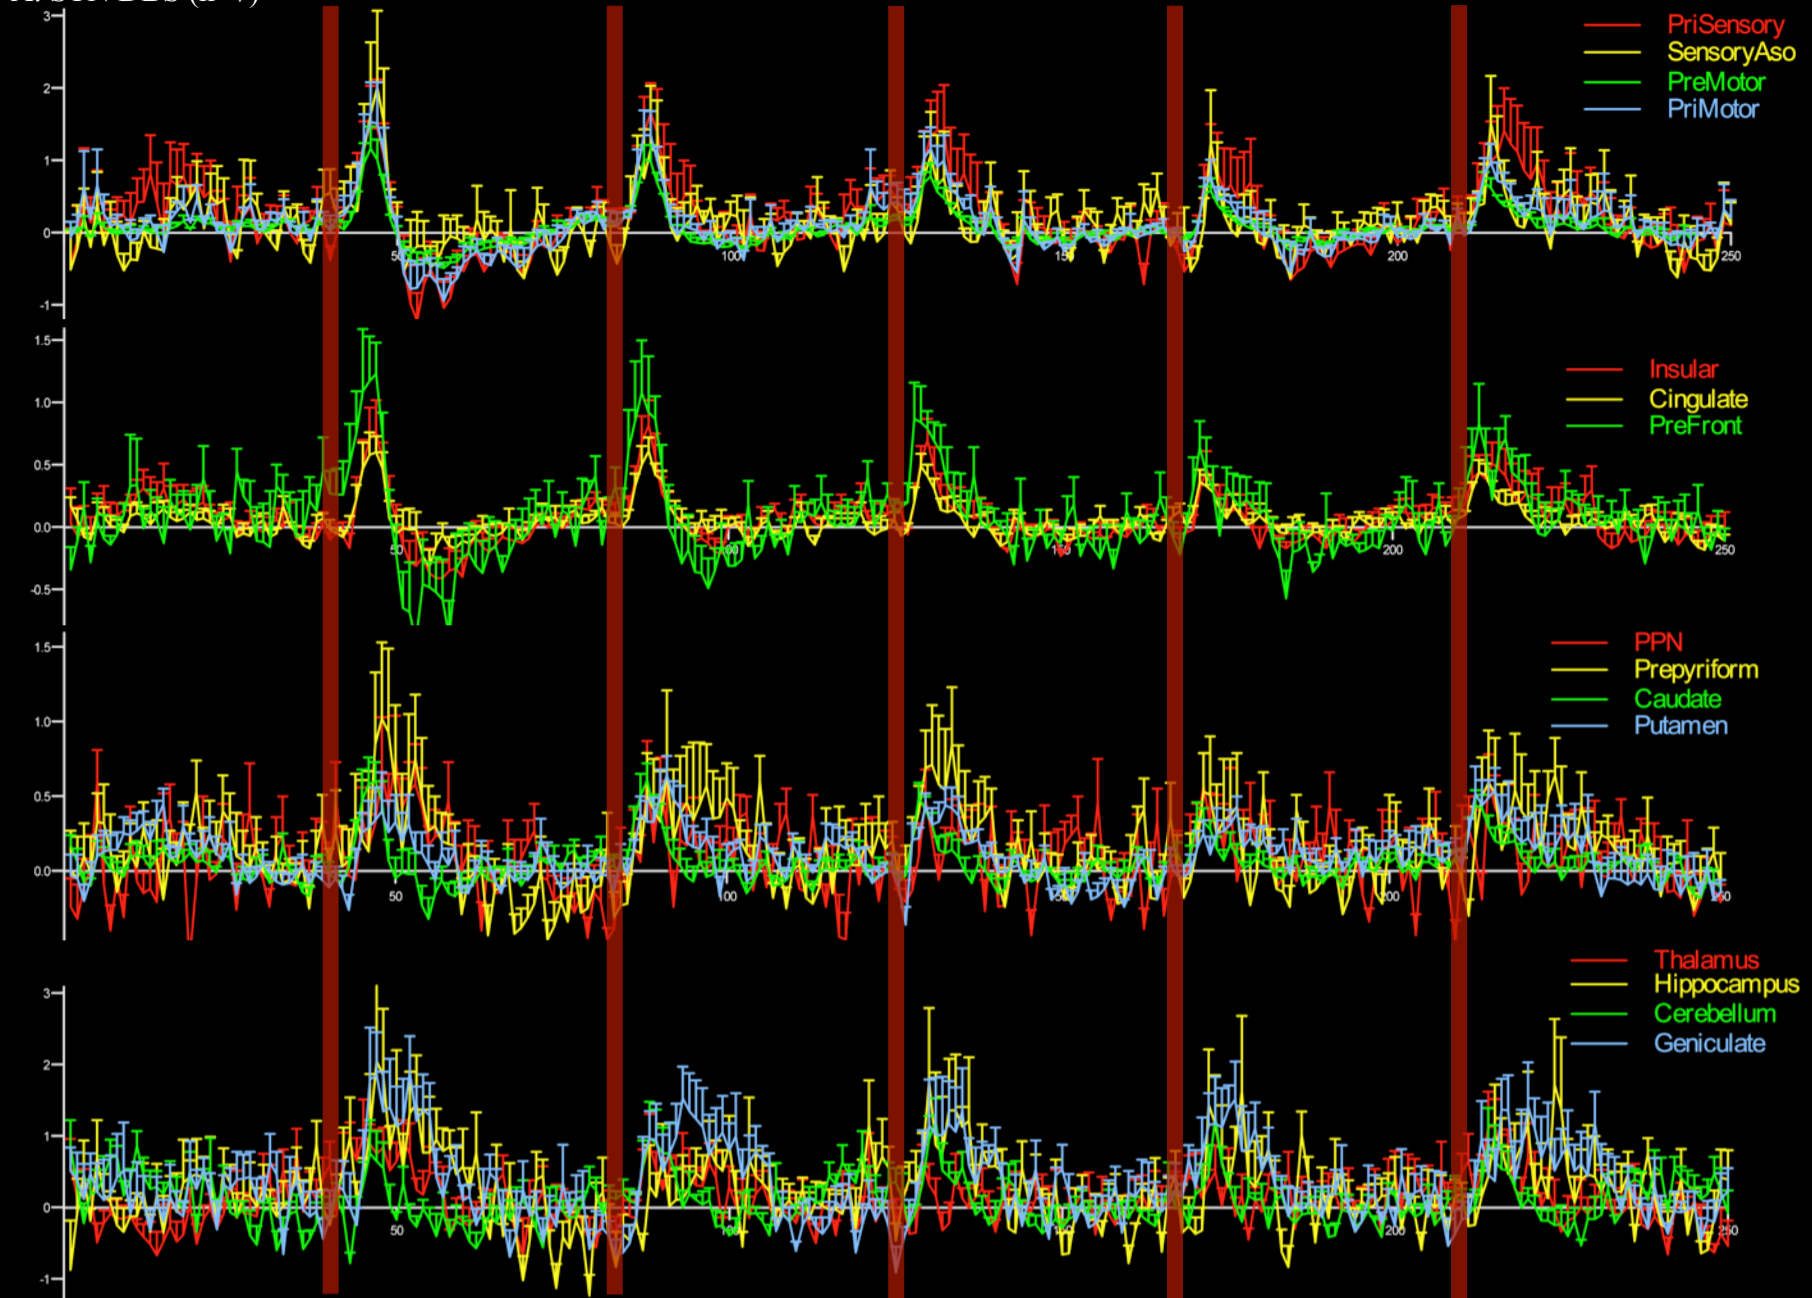

B. EN/GPi DBS (n=4)

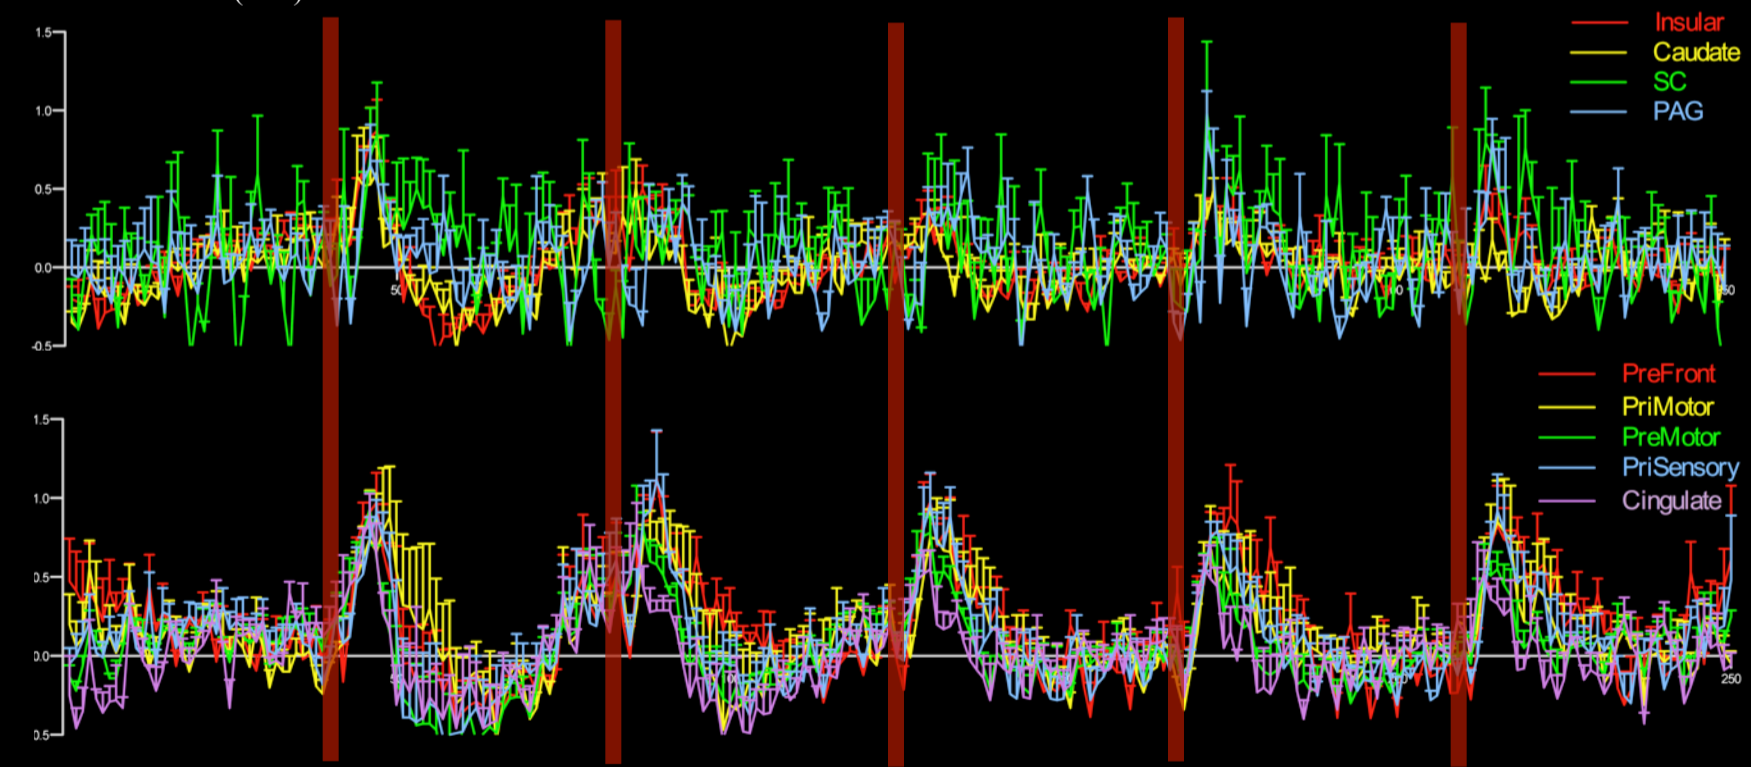

C. SN (n=1)

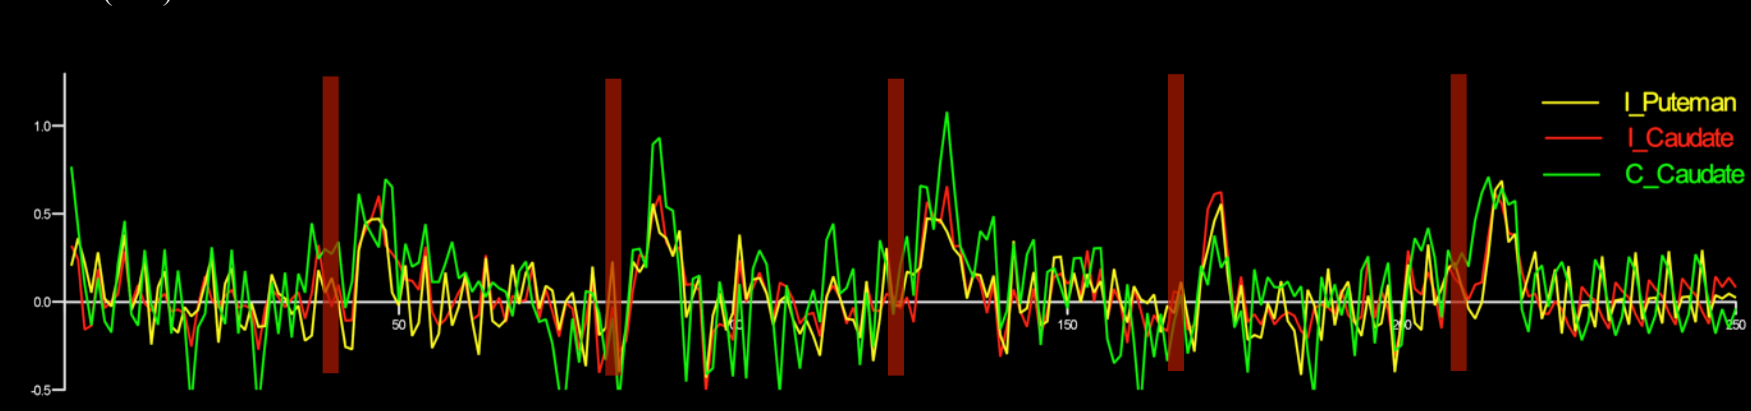

Fig. S3. Pearson Correlation between Activated Brain Areas

| STN         |                 | Caudate | Putamen | PriMotor | PreMotor | PriSensory | SensoryAso | Insular | Cingulate | Thalamus | Prepyriform | Hippocampus | Geniculate | Cerebellum | PreFront | PPN    | Temp   | ParaHipo |
|-------------|-----------------|---------|---------|----------|----------|------------|------------|---------|-----------|----------|-------------|-------------|------------|------------|----------|--------|--------|----------|
| Caudate     | Correlation     | 1.000   | 0.715   | 0.362    | 0.486    | 0.093      | 0.133      | 0.299   | 0.620     | 0.507    | 0.617       | 0.391       | 0.547      | 0.379      | 0.281    | 0.462  | 0.056  | -0.042   |
|             | Sig. (1-tailed) |         | 0.000   | 0.016    | 0.002    | 0.297      | 0.223      | 0.041   | 0.000     | 0.001    | 0.000       | 0.010       | 0.000      | 0.012      | 0.051    | 0.003  | 0.374  | 0.404    |
| Putamen     | Correlation     | 0.715   | 1.000   | 0.050    | 0.039    | -0.181     | -0.200     | 0.077   | 0.251     | 0.463    | 0.661       | -0.063      | 0.235      | 0.103      | -0.033   | 0.294  | -0.035 | 0.023    |
|             | Sig. (1-tailed) | 0.000   |         | 0.387    | 0.412    | 0.149      | 0.125      | 0.330   | 0.073     | 0.002    | 0.000       | 0.361       | 0.087      | 0.278      | 0.426    | 0.044  | 0.421  | 0.449    |
| PriMotor    | Correlation     | 0.362   | 0.050   | 1.000    | 0.819    | 0.729      | 0.859      | 0.804   | 0.694     | 0.389    | 0.292       | 0.674       | 0.765      | 0.670      | 0.163    | 0.550  | -0.128 | 0.046    |
|             | Sig. (1-tailed) | 0.016   | 0.387   |          | 0.000    | 0.000      | 0.000      | 0.000   | 0.000     | 0.011    | 0.045       | 0.000       | 0.000      | 0.000      | 0.176    | 0.000  | 0.232  | 0.397    |
| PreMotor    | Correlation     | 0.486   | 0.039   | 0.819    | 1.000    | 0.500      | 0.697      | 0.541   | 0.860     | 0.198    | 0.149       | 0.780       | 0.669      | 0.583      | 0.477    | 0.410  | 0.009  | -0.241   |
|             | Sig. (1-tailed) | 0.002   | 0.412   | 0.000    |          | 0.001      | 0.000      | 0.001   | 0.000     | 0.127    | 0.197       | 0.000       | 0.000      | 0.000      | 0.002    | 0.007  | 0.479  | 0.082    |
| PriSensory  | Correlation     | 0.093   | -0.181  | 0.729    | 0.500    | 1.000      | 0.883      | 0.864   | 0.384     | 0.040    | -0.083      | 0.474       | 0.451      | 0.487      | 0.331    | 0.400  | -0.057 | 0.235    |
|             | Sig. (1-tailed) | 0.298   | 0.149   | 0.000    | 0.001    |            | 0.000      | 0.000   | 0.012     | 0.410    | 0.318       | 0.002       | 0.003      | 0.001      | 0.026    | 0.009  | 0.372  | 0.088    |
| SensoryAso  | Correlation     | 0.133   | -0.200  | 0.859    | 0.697    | 0.883      | 1.000      | 0.864   | 0.564     | 0.032    | -0.035      | 0.697       | 0.534      | 0.557      | 0.231    | 0.395  | -0.147 | 0.031    |
|             | Sig. (1-tailed) | 0.223   | 0.125   | 0.000    | 0.000    | 0.000      |            | 0.000   | 0.000     | 0.428    | 0.422       | 0.000       | 0.000      | 0.000      | 0.091    | 0.010  | 0.200  | 0.429    |
| Insular     | Correlation     | 0.299   | 0.077   | 0.804    | 0.541    | 0.864      | 0.864      | 1.000   | 0.494     | 0.211    | 0.251       | 0.479       | 0.621      | 0.646      | 0.152    | 0.559  | -0.048 | 0.309    |
|             | Sig. (1-tailed) | 0.041   | 0.330   | 0.000    | 0.000    | 0.000      | 0.000      |         | 0.001     | 0.113    | 0.074       | 0.002       | 0.000      | 0.000      | 0.192    | 0.000  | 0.393  | 0.036    |
| Cingulate   | Correlation     | 0.620   | 0.251   | 0.694    | 0.860    | 0.384      | 0.564      | 0.494   | 1.000     | 0.263    | 0.387       | 0.655       | 0.596      | 0.489      | 0.354    | 0.461  | 0.005  | -0.132   |
|             | Sig. (1-tailed) | 0.000   | 0.073   | 0.000    | 0.000    | 0.012      | 0.000      | 0.001   |           | 0.063    | 0.011       | 0.000       | 0.000      | 0.001      | 0.019    | 0.003  | 0.490  | 0.225    |
| Thalamus    | Correlation     | 0.507   | 0.463   | 0.389    | 0.198    | 0.040      | 0.032      | 0.211   | 0.263     | 1.000    | 0.640       | 0.017       | 0.578      | 0.420      | -0.076   | 0.535  | 0.040  | 0.221    |
|             | Sig. (1-tailed) | 0.001   | 0.003   | 0.011    | 0.127    | 0.410      | 0.428      | 0.113   | 0.063     |          | 0.000       | 0.461       | 0.000      | 0.006      | 0.333    | 0.000  | 0.411  | 0.101    |
| Prepyriform | Correlation     | 0.617   | 0.661   | 0.292    | 0.149    | -0.083     | -0.035     | 0.251   | 0.387     | 0.640    | 1.000       | 0.077       | 0.555      | 0.416      | -0.327   | 0.490  | -0.110 | 0.268    |
|             | Sig. (1-tailed) | 0.000   | 0.000   | 0.045    | 0.197    | 0.318      | 0.422      | 0.074   | 0.011     | 0.000    |             | 0.330       | 0.000      | 0.007      | 0.028    | 0.002  | 0.265  | 0.060    |
| Hippocampus | Correlation     | 0.391   | -0.063  | 0.674    | 0.780    | 0.474      | 0.697      | 0.479   | 0.655     | 0.017    | 0.077       | 1.000       | 0.503      | 0.571      | 0.145    | 0.156  | -0.060 | -0.279   |
|             | Sig. (1-tailed) | 0.010   | 0.361   | 0.000    | 0.000    | 0.002      | 0.000      | 0.002   | 0.000     | 0.461    | 0.330       |             | 0.001      | 0.000      | 0.204    | 0.186  | 0.367  | 0.052    |
| Geniculate  | Correlation     | 0.547   | 0.235   | 0.765    | 0.669    | 0.451      | 0.534      | 0.621   | 0.596     | 0.578    | 0.555       | 0.503       | 1.000      | 0.747      | 0.120    | 0.536  | 0.019  | 0.154    |
|             | Sig. (1-tailed) | 0.000   | 0.087   | 0.000    | 0.000    | 0.004      | 0.000      | 0.000   | 0.000     | 0.000    | 0.000       | 0.001       |            | 0.000      | 0.246    | 0.000  | 0.458  | 0.189    |
| Cerebellum  | Correlation     | 0.379   | 0.103   | 0.670    | 0.583    | 0.487      | 0.557      | 0.646   | 0.489     | 0.420    | 0.416       | 0.571       | 0.747      | 1.000      | 0.061    | 0.499  | 0.292  | 0.229    |
|             | Sig. (1-tailed) | 0.013   | 0.278   | 0.000    | 0.000    | 0.002      | 0.000      | 0.000   | 0.001     | 0.006    | 0.007       | 0.000       | 0.000      |            | 0.364    | 0.001  | 0.045  | 0.093    |
| PreFront    | Correlation     | 0.281   | -0.033  | 0.163    | 0.477    | 0.331      | 0.231      | 0.152   | 0.354     | -0.076   | -0.327      | 0.145       | 0.120      | 0.061      | 1.000    | 0.179  | 0.219  | -0.236   |
|             | Sig. (1-tailed) | 0.052   | 0.426   | 0.176    | 0.002    | 0.026      | 0.091      | 0.192   | 0.019     | 0.333    | 0.028       | 0.204       | 0.246      | 0.364      |          | 0.152  | 0.104  | 0.087    |
| PPN         | Correlation     | 0.462   | 0.294   | 0.550    | 0.410    | 0.400      | 0.395      | 0.559   | 0.461     | 0.535    | 0.490       | 0.156       | 0.536      | 0.499      | 0.179    | 1.000  | -0.010 | 0.235    |
|             | Sig. (1-tailed) | 0.003   | 0.044   | 0.000    | 0.007    | 0.009      | 0.010      | 0.000   | 0.003     | 0.000    | 0.001       | 0.186       | 0.000      | 0.001      | 0.152    |        | 0.478  | 0.088    |
| Temp        | Correlation     | 0.056   | -0.035  | -0.128   | 0.009    | -0.057     | -0.147     | -0.048  | 0.005     | 0.040    | -0.110      | -0.060      | 0.019      | 0.292      | 0.219    | -0.010 | 1.000  | 0.092    |
|             | Sig. (1-tailed) | 0.374   | 0.421   | 0.232    | 0.479    | 0.372      | 0.200      | 0.393   | 0.490     | 0.411    | 0.265       | 0.367       | 0.458      | 0.045      | 0.104    | 0.478  |        | 0.299    |
| ParaHipo    | Correlation     | -0.042  | 0.023   | 0.046    | -0.241   | 0.235      | 0.031      | 0.309   | -0.132    | 0.221    | 0.268       | -0.279      | 0.154      | 0.229      | -0.236   | 0.235  | 0.092  | 1.000    |
|             | Sig. (1-tailed) | 0.405   | 0.449   | 0.397    | 0.082    | 0.088      | 0.429      | 0.036   | 0.225     | 0.101    | 0.060       | 0.052       | 0.189      | 0.093      | 0.087    | 0.088  | 0.299  |          |

  

| EN/GPi     |                 | Caudate | PriMotor | PreMotor | PriSensory | Cingulate | Insular | PreFront | SC     | PAG    |
|------------|-----------------|---------|----------|----------|------------|-----------|---------|----------|--------|--------|
| Caudate    | Correlation     | 1.000   | -0.163   | 0.227    | -0.319     | 0.391     | 0.535   | 0.034    | 0.397  | -0.147 |
|            | Sig. (1-tailed) |         | 0.246    | 0.169    | 0.085      | 0.044     | 0.008   | 0.443    | 0.042  | 0.268  |
| PriMotor   | Correlation     | -0.163  | 1.000    | -0.202   | -0.066     | -0.512    | 0.387   | -0.261   | -0.480 | -0.484 |
|            | Sig. (1-tailed) | 0.246   |          | 0.197    | 0.391      | 0.011     | 0.046   | 0.133    | 0.016  | 0.016  |
| PreMotor   | Correlation     | 0.227   | -0.202   | 1.000    | 0.114      | 0.716     | 0.015   | 0.382    | 0.301  | 0.071  |
|            | Sig. (1-tailed) | 0.169   | 0.197    |          | 0.317      | 0.000     | 0.475   | 0.049    | 0.099  | 0.384  |
| PriSensory | Correlation     | -0.319  | -0.066   | 0.114    | 1.000      | 0.326     | -0.301  | 0.746    | 0.126  | 0.186  |
|            | Sig. (1-tailed) | 0.085   | 0.391    | 0.317    |            | 0.081     | 0.099   | 0.000    | 0.299  | 0.216  |
| Cingulate  | Correlation     | 0.391   | -0.512   | 0.716    | 0.326      | 1.000     | 0.095   | 0.489    | 0.548  | 0.429  |
|            | Sig. (1-tailed) | 0.044   | 0.011    | 0.000    | 0.081      |           | 0.346   | 0.015    | 0.006  | 0.030  |
| Insular    | Correlation     | 0.535   | 0.387    | 0.015    | -0.301     | 0.095     | 1.000   | -0.308   | 0.150  | -0.035 |
|            | Sig. (1-tailed) | 0.008   | 0.046    | 0.475    | 0.099      | 0.346     |         | 0.093    | 0.265  | 0.442  |
| PreFront   | Correlation     | 0.034   | -0.261   | 0.382    | 0.746      | 0.489     | -0.308  | 1.000    | 0.345  | 0.197  |
|            | Sig. (1-tailed) | 0.443   | 0.133    | 0.049    | 0.000      | 0.015     | 0.093   |          | 0.069  | 0.202  |
| SC         | Correlation     | 0.397   | -0.480   | 0.301    | 0.126      | 0.548     | 0.150   | 0.345    | 1.000  | 0.413  |
|            | Sig. (1-tailed) | 0.042   | 0.016    | 0.099    | 0.299      | 0.006     | 0.265   | 0.069    |        | 0.036  |
| PAG        | Correlation     | -0.147  | -0.484   | 0.071    | 0.186      | 0.429     | -0.035  | 0.197    | 0.413  | 1.000  |
|            | Sig. (1-tailed) | 0.268   | 0.016    | 0.384    | 0.216      | 0.030     | 0.442   | 0.202    | 0.036  |        |

Correlation is significant at the 0.001 level (uncorrected)
